# Supplementary material for: 21st century fate of the Mocho-Choshuenco ice cap in southern Chile
Source: Copernicus journal article supplement (doi:10.5194/tc-2020-296), 2020-11-11
Supplement: Supplementary file [file tc-2020-296-AC1-supplement.pdf]

# Authors' reply to referee comments on "21st century fate of the Mocho-Choshuenco ice cap in southern Chile" (tc2020-296)

Matthias Scheiter, Marius Schaefer, Eduardo Flandez, Deniz Bozkurt, Ralf Greve

March 2021

We thank both anonymous referees for taking the time to evaluate our manuscript. In the following, we reply to the comments of both referees and outline how we will incorporate them in the revised version of the manuscript. The figures mentioned in the text are included at the bottom of this document.

## 1 Anonymous Referee #1

### 1.1 Major comments

#### 1.1.1 Calibration procedure and surface-mass-balance (SMB) scheme

My first concern is that the parameter calibration isn't adequately evaluated against available mass balance observations. I would argue that matching the overall volume and/or extent is not necessarily a sufficient constraint to conclude the model captures the most important features of the present-day glacier (as is concluded at several points). Given that there are mass balance observations available (already used to calibrate the sensitivity to future warming), there is yet more information that could be used to evaluate the calibrated model parameters and the initial glacier state that they yield.

**Response:** *We recognize that the lack of taking into account observed surface mass balance in the calibration of the model was a major inconsistency in our study, and thank the reviewer for pointing this out. We have carefully re-calibrated the model parameters, and attached Figure 1 shows the new fit of observed against modelled annual mean SMB at the stake locations, which we believe shows a good agreement between both.*

In particular, the calibrated value for maximum snowfall ( $S_0 = 1.07$  m/yr) strikes me as surprisingly low given the high precipitation and mass turnover rates discussed earlier in the paper. The mass balance gradient (line 167) is fixed at a (quite high) value of  $M_0 = 0.023$  yr<sup>-1</sup> (2.3 m w.e./yr per 100m vertical?). How was this chosen?

**Response:** *As described in the manuscript, these values were chosen in order to match the observed and simulated ice thickness distributions. After re-evaluation, we changed the mass balance gradient  $M_0$  to  $0.027$  yr<sup>-1</sup> which better reflects the true observed gradient, and  $S_0$  to  $2.2$  m/yr which better reflects the SMB in the vicinity of the summit. The denomination of  $S_0$  as maximum snowfall might be misleading here and is a remnant from previous applications of SICOPOLIS to the ice sheets, where surface melt in higher elevations is negligible. In our case, calling it maximum SMB is more reasonable and in order to avoid confusion we will change the name in the final version of the manuscript.*

One thing that strikes me from these values of  $S_0$  and  $M_0$  is that mass balance must plateau very quickly ( $< 50$  vertical meters) above the ELA, implying a large area where mass balance is uniform at the maximum value. Is this backed up by the available mass balance data? From my own look at Schaefer et al., (2017), it appears that both accumulation and ablation are substantial all the way to the summit in the seasonal balances (e.g., their Fig. 7). If there is in fact non-zero ablation over the entire glacier surface, the entire surface should be susceptible to surface-mass-balance anomalies

caused by further melt-season warming. However, if I understand the existing SMB scheme correctly, the model assumes warming doesn't actually cause a SMB anomaly in grid cells above the maximum snowfall cutoff. And, as noted above, this seems like a large initial area, due to the values of  $S_0$  and  $M_0$ . Should warming really only affect the lower reaches of the glacier?

**Response:** *We thank the reviewer for this sharp observation of the impact the chosen parameters had on the distribution of SMB over the ice cap. The parameters of the re-calibration fix these issues, and Figure 2 shows the SMB map resulting from the new parameters. The patterns here are in good agreement with the observed SMB map (Figure 9 in Schaefer et al., 2017).*

Obviously, no simulation can be expected to capture every detail of the mass balance, and I think a simple elevation/aspect dependent scheme can be a reasonable approach. But as described it seems like there are some embedded assumptions that may not be consistent with observations. The pattern of mass balance and the pattern of anomalies driven by warming should be included in the evaluation of optimal model parameters, given that stake data are available. If I have misinterpreted the SMB scheme, please clarify. A figure showing the initial spatial pattern of SMB could really aid the reader in interpreting how the maximum snowfall and aspect-dependent ELA affect SMB on the actual topography (e.g., beyond the schematic in Fig. 3).

**Response:** *We think that our re-calibration addresses most of the reviewer's concerns and, within the limitations of a strongly simplified SMB scheme, leads to a better representation of SMB in our model. This becomes evident in Figure 1, showing the performance of the model at individual stakes, and Figure 2, showing the overall SMB pattern on the ice cap. We propose to include Figure 2 of this document as a subplot in Figure 6 of the manuscript, and to put Figure 1 in the supplementary material.*

### 1.1.2 Assumption of steady-state for spinup

My second major comment is on the steady-state spinup for the initial condition. Assuming a steady state is questionable, given more than a century of global warming over the industrial era, to which glaciers respond with a dynamical lag. This lag means that glaciers, in general, are out of equilibrium with current climate (see, e.g., Lüthi et al., 2010; Christian et al., 2018; Marzeion et al., 2018; many others). Forcing a steady state can throw off parameters in the initial calibration (e.g., the ELA), and could throw off the initial transient response when forcing is applied.

The observations of negative mass balance (noted on line 58; from Rivera et al., 2005 and Schaefer et al., 2017) are themselves an indication of disequilibrium, and another reason to include SMB in the model calibration (granted, 5 years is not many observations to define a mean balance). The Rivera et al. study also shows substantial retreat since at least 1976, which would also suggest that the early 2000s extent is not likely to be a steady state.

At the very least, I think it is necessary to estimate how far from steady state the ice cap is at the time the simulation starts, in case the projections need to be qualified in light of this assumption, or the model recalibrated. Some first-order estimates could be made based on the ice cap's estimated response time (e.g.,  $H/b_{\text{terminus}}$ , see Johannesson et al., 1989). If the response time is long and disequilibrium substantial, it would be necessary to start the simulation earlier to properly capture the transient response for future projections. This is especially true for evaluating the difference between RCP 2.6 and 8.5 trajectories, as the "committed" response to past warming may be a substantial part of the true 2.6 trajectory (with little additional warming), but this would not be captured if the model starts in a steady state in the 2000s.

**Response:** *We thank the reviewer for their comments regarding the appropriateness of our steady-state assumption. According to the formula indicated by Johannesson et al. (1989), we compute a response time of approximately 37 years (taking a maximum measured ice thickness of 261 meters and a minimum yearly SMB of -7 m w.e./yr at stake B9, close to the terminus). As this response time is relatively high, we have replaced the steady-state spin-up by a transient spin-up that takes into account ERA5 temperature data between 1979 and 2013, a 35 year period similar to the response time. Given a trend temperature increase of around 0.2 K over this period according to ERA5, we first*

create a steady-state with an anomaly of  $-0.2$  K with respect to 2013. Then, we force the model with the temperature evolution over 35 years until 2013. The area and volume both match the observations around 2013 well. This out-of-balance glacier state is then forced by the different future scenarios in order to yield projections until 2100. As expected, the future ice loss is now significantly more pronounced than previously, as the projections start off with a negative slope that was not present in our previous projections (see Figure 3). As the new transient spin-up reflects well both SMB and geometry of the current ice cap, we are optimistic that our new projections are a reasonable guess of future ice cap evolution under the applied temperature projections.

## 1.2 Minor comments (line by line)

- Line 23: change 10000 mm/yr to 10 m/yr ? (That is a lot of zeros for the readers' eye!)

**Response:** *We will make this change in the manuscript.*

- 27: "As these are best represented in ice-flow models, they are. . ." Clarify wording: "these" and "they" presumably refer to different things here, but sentence is ambiguous

**Response:** *The sentence will be changed to "Ice-flow models incorporate these processes, and are therefore appropriate tools to project the future behaviour of the glaciers of the Wet Andes."*

- 59-61: how are you defining mass turnover here? Can you elaborate on how these temperature measurements indicate this?

**Response:** *We will clarify in the text that the rather high precipitation rates lead to high accumulation rates, and that the high mean temperature leads to high melt rates, together resulting in a high mass turnover.*

- 87: "we replaced solving the energy balance by.." somewhat awkward wording, consider rephrasing

**Response:** *Will be changed to "...we do not solve the energy balance equation. Rather, we keep the temperature..."*

- 100: "SMB should be lower"... is it? Based on observations or simulations? It would be helpful to discuss what processes likely lead to this pattern, to help the reader understand how much the model may be simplifying reality.

**Response:** *We will clarify that SMB should be lower in the north-west mainly due to the influence of solar radiation and wind-redistribution, as indicated by observations.*

- 100–104 and Fig. 3b: I'd suggest making the angle in the schematic correspond to the angle used in the actual simulations. I initially got confused as the wording in the text (referring to Mocho) doesn't correspond to the orientation in the schematic.

**Response:** *The angle in the schematic will be changed.*

- 107: if the ELA is defined by the angle with respect to the summit, and the mass balance gradient is constant, doesn't this lead to very sharp spatial variations in mass balance as points near the summit? I suppose the maximum snowfall could limit this, but is this a realistic pattern? Again, a spatial map of SMB could be useful for the reader.

**Response:** *This would be the case for very high values of  $S_0$ , but not for the range of values realistic for our ice cap. (see attached Figure 2)*

- 119: Clarify: model mean, time mean or both?

**Response:** *Sentence will be changed to: "For each individual model, the mean temperature between 2006 and 2020 was then subtracted from the whole time series, leading to anomaly temperature pro-*

jections with respect to this period."

- 136: Is precipitation taken into account for this regression? That will affect ELA variability too... It is one thing to only consider temperature for the future projections (but see later comment), but I would think the effect of each year's accumulation should be taken into account to calibrate this relationship, especially with only 4 years available.

**Response:** *We will clarify our assumption that only temperature has influence on future SMB, and only on the parameter describing the mean ELA ( $B\_ELA$ ).*

- 136: Also, is there a particular reason the temp-ELA relationship and future projections are based on annual-mean rather than melt-season temperatures? Do the climate models predict melt-season temps warm at the same rate as annual mean?

**Response:** *We notice that both annual and melt season (DJF) temperature projections of the climate models are very close to each other for the Mocho-Choshuenco volcano, indicating no important differences in the warming rates, which can give us the confidence to focus on annual scale. We will add a note on this in the revised version.*

- 167: Again, where are the values for  $M_0$  and  $\phi$  taken from?

**Response:** *We will change this paragraph to take into account the new SMB calibration, and will clarify that we chose  $\varphi_0 = 315^\circ$  due to wind redistribution and solar radiation, and obtained  $M_0 = 0.027 \text{ yr}^{-1}$  as observed mass balance gradient from the stakes.*

- 172: "does not reproduce well" ... Consider rewording for clarity.

**Response:** *Will be changed to "... where the simulation is not in a good agreement with the observations".*

- 177: 200 m/yr is very fast! Can you comment on why the model might give velocities an order of magnitude higher here than most values in Table 1? Is it the geometry, or SMB pattern that allow this?

**Response:** *In our new spin-up, the ice tongue is much shorter and does not go beyond the observed glacier outlines anymore. The velocities around and below the stake B12 are maximum 60 m/yr now, which is similar to the observed velocity of B12. As the SMB on the ice cap is the main difference between the original version of the manuscript and this update, we assume that the high velocities were caused by the previous SMB parameterization.*

- 181: I'm just curious if you know why there are seasonal but not annual velocities? I'm surprised annuals weren't derived from, e.g., mass balance stake locations. Were seasonal velocities only measured in one year?

**Response:** *Currently, the only available observations on ice flow velocity at the surface are the seasonal velocities from Geoestudios (2013), as mentioned in Section 2.1.*

- 183: As I understand from the SMB parameterization, precipitation is implicitly assumed to not change. Is this roughly consistent with the model projections and/or observed trends for the area? I'd expect that temperature is the main forcing, but recommend at least stating that this assumption is made.

**Response:** *The parameterization is only for the net SMB; it does not explicitly distinguish between precipitation and runoff. We assume that SMB changes correlate with surface temperature changes. Of all SMB parameters only the mean ELA ( $B\_ELA$ ) is changed according to temperature (and not the other parameters such as  $S_0$ ,  $M_0$ ,  $\phi$ , and  $A\_ELA$ ). We will clarify these assumptions in the paper.*

- 187: Retreat is strongest in the north for RCP 2.6... is this partly because of the imposed higher ELA and cap on mass balance?

**Response:** *Our new spin-up has a different thickness distribution in the north (where thickness is not well known due to sparsity of observations), so the description and interpretation of these results will change in the final version of the manuscript.*

- 215–17: I find this statement on internal variability confusing. Do you just mean that the spread due to different climate models and scenarios hasn't had time to diverge? Consider rewording for clarity.

**Response:** *Yes, that is what we meant. We will clarify this statement, even though the observed effect is less pronounced in the new results.*

- 220: When considering a different ELA-temperature relationship, doesn't this imply other parameters are also different (e.g. the vertical SMB gradient?). Does the initial state reflect differences in these parameters, if any?

**Response:** *The mean ELA is the only parameter that is being influenced by the increasing temperatures. Due to lack of observational data, there is no clear indication of how the SMB gradient would change with temperature, and we therefore leave it constant at the value obtained from calibration.*

- 238: "high observed velocities" ... do you mean high modeled velocities (referring to an area without extant ice)

**Response:** *Yes, this was an unclear formulation. We meant "observed in the modelling results", but will make this more clear.*

- 248: I think you mean thinner here, right?

**Response:** *Correct. We will change this.*

- 246–48: Here you have explained the low velocities in terms of anomalously thin ice, but why is the ice too thin? The combination of too-thin and too-slow together indicate that overall fluxes are underestimated in these areas... which ultimately seems like a mass balance issue. Could this be related to the rather low cap on mass balance (see major comment above)?

**Response:** *After changing the SMB parameterization, the ice on the south-western part of the ice cap is still too thin in the simulations, and the velocities too low. As the new SMB parameterization reproduces the observed SMB well (see Figures 1 and 2), we assume that these inconsistencies of our model are not primarily an SMB effect. We rather suspect dynamical reasons, and will add this in the discussion.*

-253–54: I find it a bit circular to invoke a "stable position at the moment" to explain a model result, when the stable position is imposed by your choice of a steady-state initial condition. This is one area where the steady-state assumption (see major comment) can affect projections.

**Response:** *These parts of the discussion will change according to our new projections which have changed significantly (see Figure 3).*

- 266: Suggest word choice other than "unstable". . . there's no instability in a dynamical sense here, just a larger forcing.

**Response:** *We will exchange lines 265–270 by: "The high-end atmospheric warming scenario RCP8.5 causes a highly accelerated ice loss from the 2040s to the 2080s with high retreat rates, before becoming more subtle from 2080 to 2100, which can be explained by the fact that most ice has already melted away."*

- 316: “would have disappeared” » projected to disappear?

**Response:** *We will change this formulation.*

- 319: “maintained glacier area constant” » “maintained a constant glacier area” ?

**Response:** *Will be changed.*

- 330: “lost majority of their ice mass” ... relative to preindustrial?

**Response:** *We will add "... relative to the glaciers observed at present".*

- 331: “The” » this

**Response:** *Will be changed.*

- 331-332: general comment here that different proportions of volume lost over a given timeframe can be due simply to different glacier geometries/hypsometries. I think that should be borne in mind for all of the comparisons in this section...

**Response:** *We will mention the impact of glacier geometry on volume loss in this section in the final version of the manuscript.*

- 357: missing period

**Response:** *Will be added.*

- 370: then » than

**Response:** *Will be changed.*

## 2 Anonymous Referee #2

### 2.1 General/major comments

#### 2.1.1 Assumption of steady-state for spin-up

[T]he paper starts by introducing the glaciers of the southern Andes having among the highest mass losses of all glacier regions worldwide, and specifies a SMB of almost -1 m w.e./year in observations for the Mocho-Choshuenco ice cap (L58). However, the method assumes a zero mass balance of ice cap under present-day (2006-2020) conditions, by requiring that the ice cap’s geometry is closely reproduced by the model as a steady state at a temperature anomaly of zero. This is a strong internal inconsistency which is currently not at all addressed in the paper.

**Response:** *We thank the reviewer for pointing out the inappropriateness of a steady-state as starting point for the future projections. We have addressed these concerns by creating a transient rather than steady-state spin-up. Taking into account 35 years of ERA5 temperature data (1979-2013), we first create a theoretical steady-state for the 1970s and then force the model with the ERA5 data until 2013. This spin-up leads to an ice cap in an out-of-equilibrium state in 2013, and we hope it satisfies the concerns of the reviewer. The subsequent future projections are much more negative than before, using a steady-state spin-up for 2013 (comparison between Figure 3 below and Figure 8 in the original manuscript).*

Closely related is the lack of discussion of the parameter values obtained by matching the steady-state thickness as closely as possible to observations: equation 9 indicates  $B_{ELA} = 1777$  m from the observation as opposed to 2035 m from the observation, which (again according to eq. 9) corresponds

to a temperature offset of almost 3 K  $((2035 \text{ m}-1777 \text{ m})/88\text{m/K})$ .

**Response:** *There seems to be a misunderstanding here, as we do not state that  $B\_ELA = 1777 \text{ m}$ . The value of  $1777 \text{ m}$  is rather the intercept of the weighted linear regression we perform in this section. It is therefore the value the ELA would take if the mean annual temperature was  $0^\circ \text{C}$ , as indicated in line 140. With a temperature-ELA gradient of  $88\text{m/K}$  and a mean annual temperature at the ice cap of around  $2.6^\circ \text{C}$ , this regression leads to a mean ELA of  $1777 \text{ m} + 88\text{m/K} \cdot 2.6\text{K} \approx 2005 \text{ m}$ , which corresponds the observed mean ELA. This section is not related to the calibration of  $A\_ELA$  or  $B\_ELA$ . In order to avoid future confusion, we will clarify the meaning of the  $1777 \text{ m}$  by stating it after equation 9, and will in the opening paragraph clearly state that this section is only about observations and focused on finding a relationship between temperature and ELA, and not aimed at calibrating the model parameters.*

The turnover of  $5 \text{ m w.e./year}$  (L59) is in apparent contradiction to a maximum annual snow fall  $S\_0$  of about  $1 \text{ m}$  as best parameter values (L166).

**Response:** *Instead of referring to a mass turnover of  $5 \text{ m w.e./yr}$ , we will state a high mass turnover due to a mean modelled accumulation of  $3.5 \text{ m w.e.}$  (see Figure 8 in Schaefer et al 2017). Also, we recognise that the denomination of  $S0$  as maximum snowfall is misleading in the context of this study, and will change the name to "maximum SMB" in the final manuscript. The name is a remnant from previous studies involving SICOPOLIS. The new value of  $S0$   $2.2 \text{ m w.e./yr}$  is closer to the observations.*

The initialization of an ice flow model is a complex task, but has been addressed before (e.g., Eis et al. 2019, DOI: 10.5194/tc-13-3317-2019; Zekollari et al. 2019, DOI: 10.5194/tc-13-1125-2019). These studies may be helpful for coming up with an adequate initialization approach.

**Response:** *We thank the reviewer for these literature suggestions, which were indeed helpful in producing a transient spin-up for the year 2013. Due to different data availability and study scope, we did not implement these exactly, but our study follows the main idea of both initialization procedures.*

### 2.1.2 Lack of validation of modeled SMB

[T]he authors chose the somewhat unusual way to calibrate parameters of the mass balance equation through matching observed and modeled ice thickness, which I would assume are closer related to parameters of the ice flow model (which are also included in the observation). I don't understand the rationale of this approach, given that mass balance observations are available, and could easily be used for optimizing the mass balance parameters. At the same time, an evaluation of the model's performance concerning SMB is completely lacking.

**Response:** *Our previous calibration of SMB parameters and sliding parameter was focused on matching the geometry of the ice cap by minimising the RMSE of modelled against observed ice thickness, and out of the best models choosing the one that best matches the observed ice volume, as explained in lines 162-167. This procedure was successful as it was able to reproduce the overall geometry of the ice cap, in terms of volume, mean ice thickness, and area (but, as pointed out by both reviewers, lacking an evaluation of SMB). We disagree with the statement that matching the geometry is an unusual approach, as many studies have done this in the past, including the two cited above by the reviewer (Eis et al., 2019; Zekollari et al., 2019). We agree that it is important to also validate the modelled SMB against observed SMB, which was lacking in our previous approach. We thank the reviewer for pointing this out, and have carefully re-calibrated the SMB parameters. The new parameters are  $\Phi_0 = 315^\circ$ ,  $A\_ELA=87.5\text{m}$ ,  $B\_ELA=2050\text{m}$ ,  $M_0=0.027 \text{ 1/yr}$ , and  $S_0 = 2.2 \text{ m w.e./yr}$ . This parameterization matches better both the observed SMB at the stakes (see attached Figure 1) and the SMB distribution of the ice cap (see Figure 2). We are therefore confident that the SMB in our model reflects the SMB of the real ice cap better than previous to the reviews. We suggest to include Figure 2 of this document in the main paper, and Figure 1 in the supplementary material.*

Since a steady state condition is used for the recent past as spin-up, and observations of the SMB during a very similar period are  $0.9 \text{ m w.e./yr}$ , I suspect that the model has a positive bias of around

+0.9 m w.e./yr (not exactly, because the observations only cover a fraction of the glacier’s surface). If these presumptions are correct, this would imply that also the projections have a strong positive SMB bias, such that they would strongly underestimate the future rate of mass loss. It is good that the authors evaluate their results against ice thickness and velocity observations, but with the application in projections of mass change in mind, the evaluation of the SMB results is even more important. Without a convincing evaluation the projections cannot be trusted.

**Response:** *We thank the reviewer for raising these concerns. Indeed, from our experiments it appears to be the case that the transient spin-up imposes a more negative mass balance on the ice cap than a comparable steady-state spin-up. As mentioned above, we have updated our SMB calibration approach, and we hope that the attached Figures 1 and 2 provide the evaluation the reviewer asked for.*

### 2.1.3 Discussion of comparable studies

At two occasions in the manuscript (L29ff L312ff, the authors state that there are few studies that have projected the future evolution of glaciers in den Andes). Among the studies they cite is Hock et al. (2019), which alone summarizes six studies; a more recent intercomparison is Marzeion et al. (2020, DOI: 10.1029/2019EF001470), which includes seven different models. These are additional to the ones discussed in the paper, but very different in that they don’t focus on one (or a few) individual glacier(s), but include all glaciers worldwide. I think it is possible to turn this study into a publishable paper even though by now, there are many models around that have been applied to this specific glacier. But it will be necessary to go into the individual model publications (not just the intercomparison paper, as done now) and see how they are approaching the problem, and discuss the merits of the approach used here approach in this context: what are the advantages of their mass balance parameterization over those used in the models summarized in Hock et al. (2019) and Marzeion et al. (2020)? What are the advantages of using SICOPOLIS instead of the (mostly simpler) approaches in the global models?

**Response:** *We agree with the reviewer that the mentioned global studies are valuable as they compare all or most glaciers world-wide under similar conditions and derive conclusions on the general state and future evolution of glaciers, and important consequences such as sea-level rise and fresh-water supply. However, it is of at least equal importance to perform local, high-resolution studies, both to inform in detail about the specific conditions in the area, and to give an estimate against which the results of global studies can be evaluated. The simplifications of most global studies lead to inconsistencies on a local scale. For example, simple area-volume relationships (averaged over a huge amount of glaciers) do not account for the local specifics. Simple SMB parameterizations (as in most studies of Hock et al. (2019) and Marzeion et al. (2020)) do not take into account small-scale variations such as introduced by our aspect-dependent parameterization, but likely treat the whole ice cap as one grid point. On the Mocho-Choshuenco ice cap, a relatively large amount of small-scale, high-resolution observations is available (more than on most other glaciers in the southern Andes), and it therefore gives a great opportunity to perform a high-resolution study against which studies of coarser resolution can be compared. Another concern about the studies featuring in the intercomparison studies is that most of them do not include a proper parameterization for frontal ablation and calving (as already mentioned in our discussion in lines 333-340). As this is an important form of mass loss in Patagonia, and Patagonian glaciers in turn are dominant in analyses of the whole southern Andes, the conclusions possible to draw on the Mocho-Choshuenco ice cap are likely limited. In such cases, our study (and many other local/regional studies performed world-wide) can provide useful feedback on the performance of global modelling approaches. We are therefore convinced that our study is valuable (even more so after the considerable improvements that were made based on the reviewers’ suggestions) and makes an important contribution to the understanding of glacier behaviour in the southern Andes.*

I am convinced that once the first two major issues are addressed by the authors, the results will change substantially. I have therefore abstained from providing detailed/minor comments to the sections that present or discuss these results. These should be addressed at a later stage, if the authors decide to revise and resubmit the paper.

**Response:** *We have addressed both major issues in our new SMB calibration and the transient spin-up. The results have changed and we will update the sections that present and discuss them, and are*



happy to receive further comments on them afterwards.

## 2.2 Specific/minor comments/suggestions

- L14: I don't see this generalization backed up by the study results.

**Response:** *Most glaciers in the area have a similar setting, both in a geographical and climatological sense. We provide the first projections based on ice-flow modelling for this area, which gives a volume loss up to 94% until the end of the century. We think it is reasonable to expect that if this ice cap loses almost all its mass the neighbouring glaciers would be affected to a similar degree.*

- L24: I assume there is a strong seasonality in this number; it would be helpful to be a bit more specific.

**Response:** *We will add that the cited reference states an overall modest seasonality for the Wet Andes.*

- L54: repetitive, can be shortened.

**Response:** *We will change the first two sentences of this paragraph to "The Mocho-Choshuenco ice cap covers the Mocho-Choshuenco volcanic complex, which is located in the Chilean Lake District at ..."*

- L61: it can be explained by the climatology, as documented in the data – not the data itself.

**Response:** *We will change this formulation.*

- L62: based on the setting of the station and the glacier (orography, wind direction, etc.) would you expect precipitation at the glacier to be higher or lower than in Puerto Fuy? A qualitative assessment would be helpful for readers unfamiliar with the area.

**Response:** *We will add in the final version of the manuscript that orographic precipitation effects lead to a considerably higher amount of precipitation on the ice cap than in Puerto Fuy.*

- L76: is an uncertainty assessment available either the total volume?

**Response:** *We assume that the reviewer refers to line 66. Unfortunately, the study we cite regarding the estimated volume of the ice cap does not provide an uncertainty assessment.*

- Fig. 3b and discussion around it is a bit confusing. Assuming that  $A_{ELA}$  and  $B_{ELA}$  are both positive, and that  $y$  is latitude, the maximum ELA would be in the north-east sector. However, the text says the SMB should be lower (equivalent to a higher ELA) in the north-western sector. Since you prescribe  $\phi_0$  anyway (L167), why not make Fig. 3b using the actual values used?

**Response:** *We will change the schematic and display the angle  $\phi_0$  in a north-western direction.*

- L136: by the ELA,  $M_0$  and  $S_0$ .

**Response:** *We will clarify our assumption that future temperature anomalies only affect the mean ELA of the ice cap ( $B_{ELA}$ ).*

- Eq. 5 and following: I'm unfamiliar with this notation. Please explicitly define  $N$ . Shouldn't it be  $\hat{G}$  in the equation? Also, I think it would be correct to speak of a standard error, not standard deviation (Fig. 5, and L154).

**Response:** *We will change "bivariate normal distribution" in line 143 into "bivariate normal distribution  $\mathcal{N}(\mu, \Sigma)$ ", and  $G$  into  $\hat{G}$  in equation 5.*

- L167: how were the values for  $\phi_0$  and  $M_0$  determined?

**Response:** *We will change this paragraph to account for the new SMB calibration, and will clarify that  $M_0$  is fixed to represent the observed SMB gradient, and  $\phi_0$  is set to  $315^\circ$  in agreement with the observed effects solar radiation and wind-redistribution have on the ice cap.*

- Table 1: a statistical evaluation would be helpful: what is the correlation, the RMSE, the bias of the model?

**Response:** *We think that a statistical evaluation of as few as six value pairs has to be treated with caution, especially given the fact that we are here comparing seasonal against annual velocities, and just aim to get an overall insight of the magnitude of the velocities. This is given in the current form of the table. However, we will indicate an RSME of 12.5 m/yr and an average underestimation of 9.4 m/yr of the simulated values compared to the observed ones.*

- Fig. 6/Sect. 3.1: instead of using the interpolated ice thicknesses for evaluation, the profiles should be used. Only this will allow a quantitative and robust assessment of the model results (e.g., what is the correlation between observations and model results? What is the RMSE? Is there a bias?).

**Response:** *In the attached Figure 4, we plotted the observed ice thickness values along the profiles against the simulated ice thickness on the same location (obtained through interpolation from the grid to the profile points). It shows an overall good fit with a high correlation coefficient and a low RMSE compared to the magnitude of the values. On average, the simulated ice thickness is around 10 m lower than the observed ice thickness on the profiles. When performing a similar analysis on the gridded data (interpolated observations against modelled ice thickness), the values are similar, but the bias is lower, with the model underestimating ice thickness by around 2 m on average. We will add this information in the manuscript, and Figure 4 in the supplementary material.*

- L224-225: the description of the lines should be in the caption of Fig. 9, not in the text.

**Response:** *We will put the description into the figure caption.*

- Sect. 4.4: see general comment above, but additionally: the selection of studies you compare to that project glacier evolution for individual glaciers seems a bit random. I would suggest to focus only on these that include glaciers in the Southern Andes.

**Response:** *In this section, we aim to put our study in context with other studies that have performed ice-flow simulations. The only other ice-flow simulation that projects future glacier behaviour in the Andes under climate change scenarios is that of Réveillet et al. (2015) on Zongo glacier in the tropical Andes, and there are no studies available for the southern Andes. In the absence of direct comparisons, we think it is valuable to compare the ice loss projected by our model to the losses projected in other areas in the world with similar methodologies. However, we agree that it can also be helpful to go into more detail with the comparison studies, and will do so in the final version of the paper.*

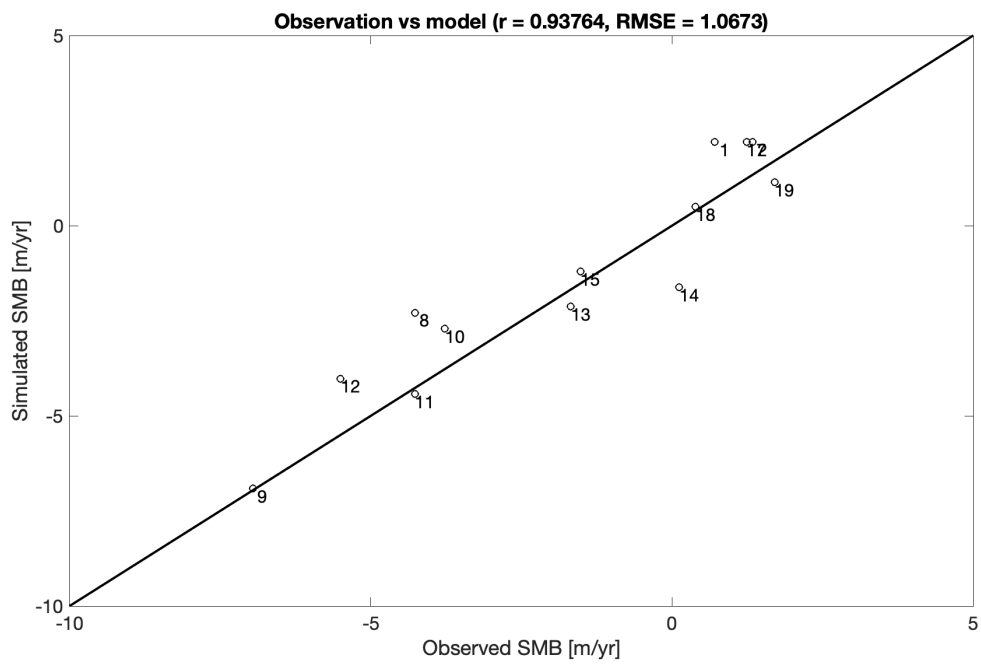

Figure 1: Comparison between modelled and observed surface mass balance at the stake locations after re-calibrating the SMB parameters.

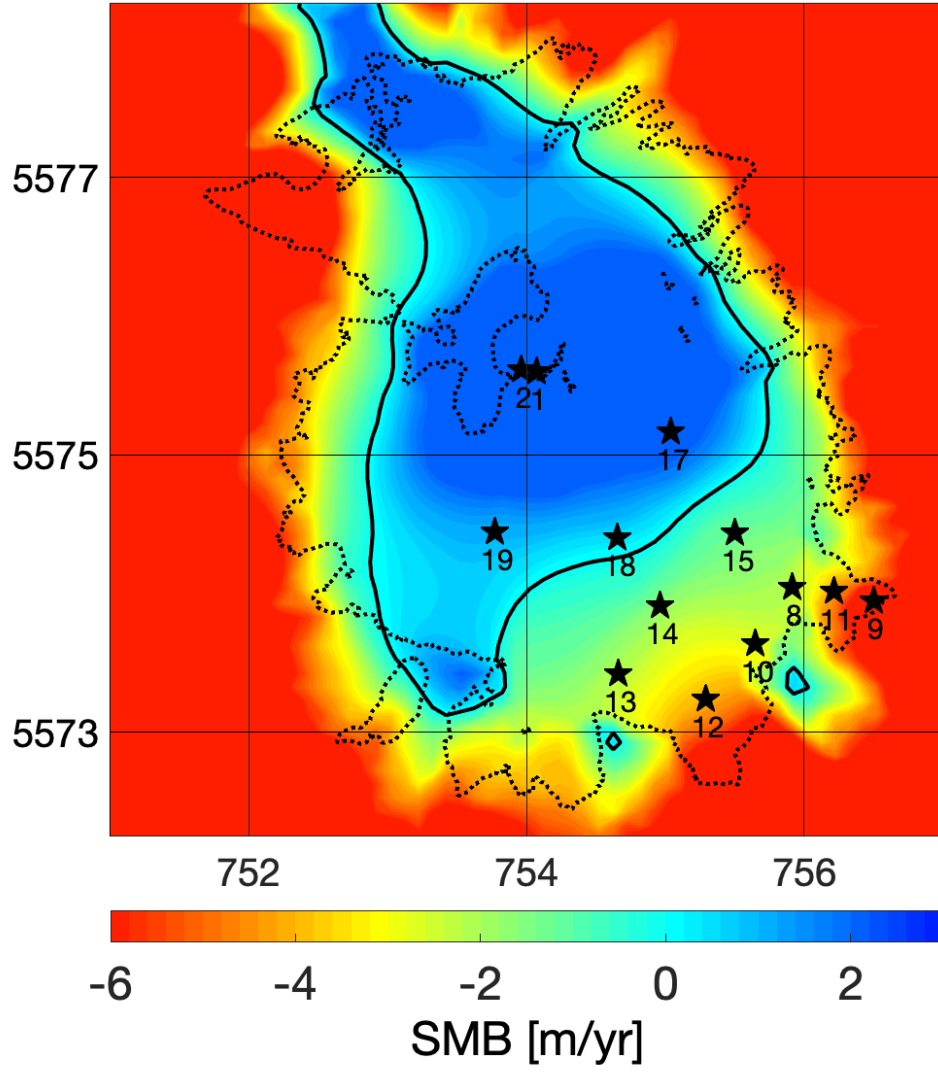

Figure 2: Surface mass balance map on the ice cap after re-calibrating the SMB parameters.

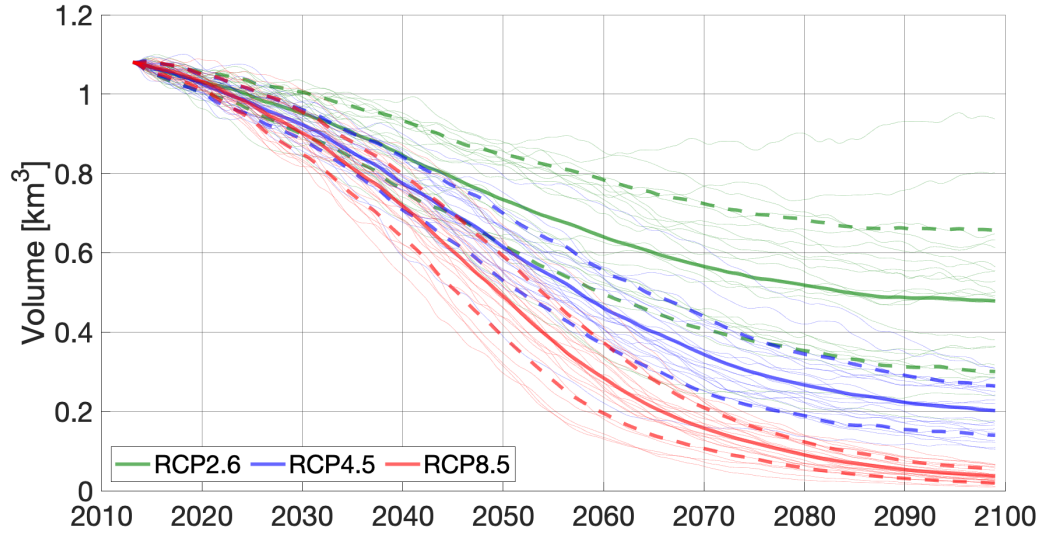

Figure 3: Future projections with the new transient spin-up, for comparison with Figure 8 of the original manuscript.

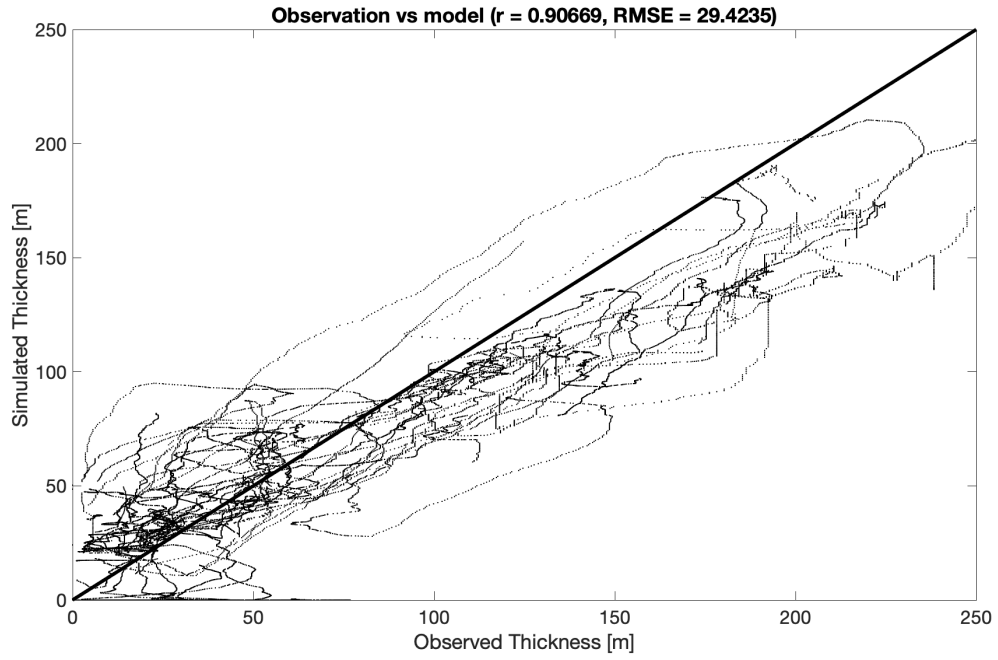

Figure 4: Evaluation of ice thickness as modelled on locations of profile measurements.
